# Supplementary material for: Hollow nanotubular toroidal polymer microrings
Source: Springer Nature journal article supplement (doi:10.1038/nchem.1833), 2014-01-03
Supplement: 41557_2014_BFnchem1833_MOESM3_ESM.mol [file 41557_2014_BFnchem1833_MOESM3_ESM.mol]

  ChemDraw12111310022D

 10  9  0  0  0  0  0  0  0  0999 V2000
   -3.2139   -0.2069    0.0000 S   0  0  0  0  0  0  0  0  0  0  0  0
   -2.4994    0.2056    0.0000 C   0  0  0  0  0  0  0  0  0  0  0  0
   -1.7850   -0.2069    0.0000 C   0  0  0  0  0  0  0  0  0  0  0  0
   -1.0705    0.2056    0.0000 O   0  0  0  0  0  0  0  0  0  0  0  0
   -0.3560   -0.2069    0.0000 C   0  0  0  0  0  0  0  0  0  0  0  0
    0.3584    0.2056    0.0000 C   0  0  0  0  0  0  0  0  0  0  0  0
    3.2139    0.2069    0.0000 S   0  0  0  0  0  0  0  0  0  0  0  0
    2.4994   -0.2056    0.0000 C   0  0  0  0  0  0  0  0  0  0  0  0
    1.7850    0.2069    0.0000 C   0  0  0  0  0  0  0  0  0  0  0  0
    1.0705   -0.2056    0.0000 O   0  0  0  0  0  0  0  0  0  0  0  0
  2  1  1  0      
  3  2  1  0      
  4  3  1  0      
  5  4  1  0      
  6  5  1  0      
  6 10  1  0      
  8  7  1  0      
  9  8  1  0      
 10  9  1  0      
M  END
